# Supplementary material for: Electrochemical reactions in fluoride-ion batteries: mechanistic insights from pair distribution function analysis
Source: Royal Society of Chemistry journal article supplement (doi:10.1039/c7ta04005a), 2017-01-01
Supplement: c7ta04005a1.pdf [file c7ta04005a1.pdf]

## Supporting information

### Electrochemical reactions in fluoride-ion batteries: mechanistic insights from Pair Distribution Function analysis

Antonin Grenier,<sup>a</sup> Ana-Gabriela Porras-Gutierrez,<sup>a</sup> Henri Groult,<sup>a</sup> Kevin A. Beyer,<sup>b</sup> Olaf J. Borkiewicz,<sup>b</sup> Karena W. Chapman,<sup>b</sup> Damien Dambournet<sup>a,\*</sup>

<sup>a</sup> Sorbonne Universités, UPMC Univ Paris 06, CNRS, UMR 8234, PHENIX, F-75005 Paris, France. \*E-mail : [damien.dambournet@upmc.fr](mailto:damien.dambournet@upmc.fr)

<sup>b</sup> X-ray Science Division, Advanced Photon Source, Argonne National Laboratory, 9700 South Cass Avenue, Argonne, Illinois 60439, United States.

<sup>c</sup> Réseau sur le Stockage Electrochimique de l'Energie (RS2E), FR CNRS 3459, France.

| Phase name                                                                   | Crystal system | Space group             | a (Å)  | b (Å) | c (Å)  | α (°) | β (°) | γ (°) | Ref./ICSD Coll. Code                    |
|------------------------------------------------------------------------------|----------------|-------------------------|--------|-------|--------|-------|-------|-------|-----------------------------------------|
| La <sub>0.95</sub> Ba <sub>0.05</sub> F <sub>2.95</sub>                      | Trigonal       | <i>P</i> -3 <i>c</i> 1  | 7.20   | 7.20  | 7.37   | 90    | 90    | 120   | Rongeat <i>et al.</i> <sup>1</sup>      |
| La <sub>0.95</sub> Ba <sub>0.05</sub> F <sub>2.95</sub>                      | Trigonal       | <i>P</i> -3 <i>c</i> 1  | 7.207  | 7.207 | 7.373  | 90    | 90    | 120   | Chable <i>et al.</i> <sup>2</sup>       |
| LaF <sub>3</sub>                                                             | Trigonal       | <i>P</i> -3 <i>c</i> 1  | 7.185  | 7.185 | 7.351  | 90    | 90    | 120   | 23972                                   |
| Bi                                                                           | Trigonal       | <i>R</i> -3 <i>m</i>    | 4.546  | 4.546 | 11.862 | 90    | 90    | 120   | 64703                                   |
| α-Bi <sub>2</sub> O <sub>3</sub>                                             | Monoclinic     | <i>P</i> 21/ <i>c</i>   | 5.844  | 8.157 | 7.503  | 90    | 113   | 90    | 94229                                   |
| β-BiF <sub>3</sub>                                                           | Orthorhombic   | <i>Pnma</i>             | 6.561  | 7.015 | 4.841  | 90    | 90    | 120   | 1269                                    |
| α-BiF <sub>3</sub>                                                           | Cubic          | <i>Fm</i> -3 <i>m</i>   | 5.861  | 5.861 | 5.861  | 90    | 90    | 90    | Hund and Frick <sup>3</sup> /24522      |
| β-BiO <sub>x</sub> F <sub>3-2x</sub>                                         | Cubic          | <i>Fm</i> -3 <i>m</i>   | 5.848  | 5.848 | 5.848  | 90    | 90    | 90    | Morell <i>et al.</i> <sup>4</sup>       |
| BiO <sub>0.1</sub> F <sub>2.8</sub>                                          | Hexagonal      | <i>P</i> 63/ <i>mmc</i> | 4.083  | 4.083 | 7.323  | 90    | 90    | 120   | 24056                                   |
| BiO <sub>0.55</sub> F <sub>1.9</sub><br>c-BiO <sub>x</sub> F <sub>3-2x</sub> | Trigonal       | <i>R</i> -3 <i>m</i>    | 4.138  | 4.138 | 20.321 | 90    | 90    | 120   | Laval <i>et al.</i> <sup>5</sup> /50823 |
| Bi <sub>7</sub> F <sub>11</sub> O <sub>5</sub>                               | Monoclinic     | <i>C</i> 121            | 13.524 | 5.529 | 9.189  | 90    | 96    | 90    | 167074                                  |
| BiOF                                                                         | Tetragonal     | <i>P</i> 4/ <i>nmm</i>  | 3.747  | 3.747 | 6.226  | 90    | 90    | 90    | 24096                                   |

**Table S1.** Crystallographic data relevant to the study of the Bi-BiF<sub>3</sub> composite electrodes. Please refer to the corresponding reference or ICSD collection code for more details. a, b and c represent the lattice parameters and α, β and γ the lattice angles.

- 1 C. Rongeat, M. Anji Reddy, R. Witter and M. Fichtner, *ACS Appl. Mater. Interfaces*, 2014, **6**, 2103–2110.
- 2 J. Chable, A. Gil Martin, A. Bourdin, M. Body, C. Legein, A. Jouanneaux, M.-P. Crosnier-Lopez, C. Galven, M. Leblanc, A. Demourgues and V. Maisonneuve, *J. Alloys Compd.*, 2016, **692**, 980–988.
- 3 V. F. Hund and R. Fricke, *Zeitschrift fuer Anorg. und Allg. Chemie*, 1949, **258**, 198–204.
- 4 A. Morell, B. Tanguy and J. Portier, *Bull. Soc. Chim. Fr.*, 1971, **7**, 2502–2504.
- 5 J. P. Laval, J. C. Champarnaud-Mesjard, A. Britel and A. Mikou, *J. Solid State Chem.*, 1999, **59**, 51–59.
